# Supplementary material for: Criticality as a Determinant of Integrated Information Φ in Human Brain Networks
Source: MDPI journal article supplement (doi:10.3390/e21100981), 2019-10-08
Supplement: s1 [file s1]

Supplementary Material

# Criticality as a Determinant of Integrated Information $\Phi$ in Human Brain Networks

Hyoungkyu Kim, Anthony G Hudetz, George A Mashour and UnCheol Lee\*

\* Correspondence: UnCheol Lee: ucllee@med.umich.edu

## 1. Experimental Procedure of the Study of Sevoflurane-Induced Unconsciousness in Humans

The EEG data was recorded from seven healthy volunteers (4 males, 20–23 years of age) who gave their written informed consent participated in the study. Participants were American Society of Anesthesiologists class 1 physical status, body mass index less than 30, with Mallampati 1 or 2 airway classifications. The participants were excluded with a pregnancy, or a history of obstructive sleep apnea, gastroesophageal reflux, cardiac conduction abnormalities, asthma, epilepsy, drug use, any neurologic or psychiatric problems, and problems with anesthesia. Participants kept their eyes closed during the experiment. Sevoflurane was administered by a secured face mask at an initial concentration of 0.4% in high-flow oxygen (8 L/min). After 15-min equilibration of each concentration, the EEG data were recorded during 10-min at the target concentration. The concentration of sevoflurane was increased by levels of 0.2% until the participants lose their responsiveness(LOR). After 10-min period of LOR, the reverse protocol was proceed until the responsiveness is recovered. The participants were instructed to squeeze objects in each hand every 30 s for assessing responsiveness. 64-channels sensor cap from Electrical Geodesics, Inc. was used to record EEG with a sampling frequency 500Hz. The impedance of channels was reduced to below 50 K $\Omega$  before data acquisition.

## 2. Supplementary Tables

**Table S1.** Statistical tests of Pair Correlation Function(PCF) and integrated information( $\bar{\Phi}$ ) among supercritical, critical, and subcritical states in model.

| PCF           | Supercritical | Critical | Subcritical | $\Phi$        | Supercritical | Critical | Subcritical |
|---------------|---------------|----------|-------------|---------------|---------------|----------|-------------|
| Supercritical |               | ***      |             | Supercritical |               | ***      |             |
| Critical      |               |          | ***         | Critical      |               |          | ***         |
| Subcritical   |               |          |             | Subcritical   |               |          |             |

\*  $p \leq 0.05$  \*\*  $p \leq 0.01$  \*\*\*  $p \leq 0.001$

**Table S2.** Statistical tests of Pair Correlation Function(PCF) and integrated information( $\bar{\Phi}$ ) among baseline, induction, anesthesia, and recovery states in experiment. The baseline, induction, anesthesia, and recovery states are the average of 10-min with 0%, 0.4%, 0.8%, 0% drug concentrations, respectively.

| PCF        | Baseline | Induction | Anesthesia | Recovery | $\Phi$     | Baseline | Induction | Anesthesia | Recovery |
|------------|----------|-----------|------------|----------|------------|----------|-----------|------------|----------|
| Baseline   |          |           | **         |          | Baseline   |          |           | **         |          |
| Induction  |          |           | *          |          | Induction  |          |           | **         |          |
| Anesthesia |          |           |            | *        | Anesthesia |          |           |            | **       |
| Recovery   |          |           |            |          | Recovery   |          |           |            |          |

\*  $p \leq 0.05$  \*\*  $p \leq 0.01$

### 3. Supplementary Figure

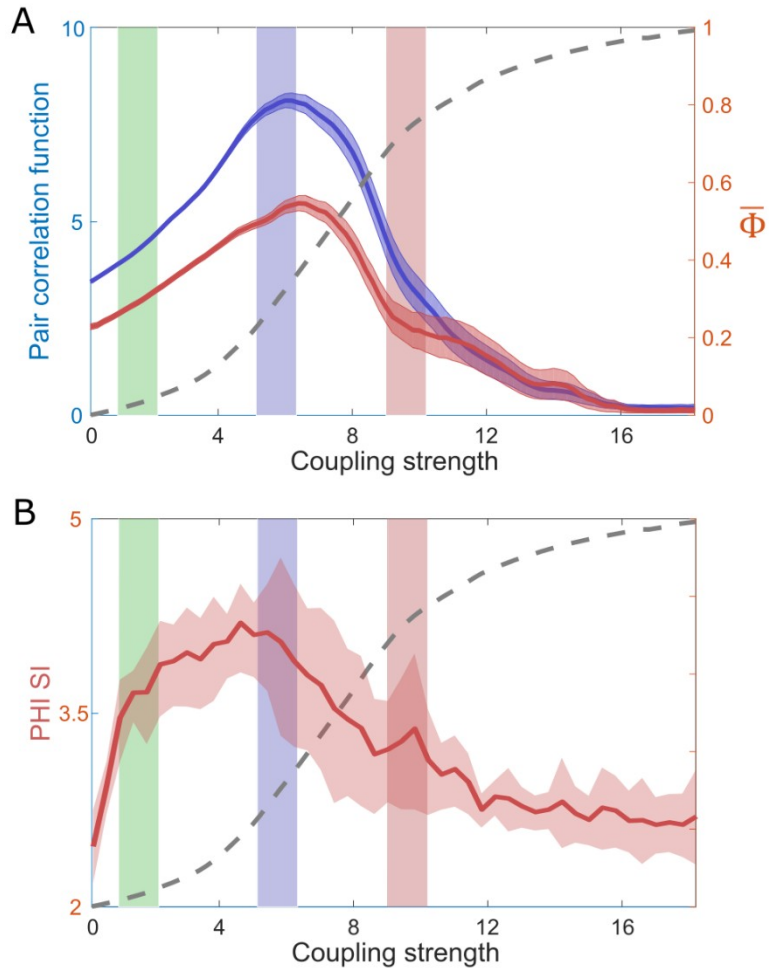

**Figure S1.** In order to test the robustness for the relationship between integrated information and criticality (measured by pair correlation function), we tested another integrated information measure,  $\Phi_{SI}$ , recently introduced with its toolbox [50]. We compared the two integrated information measures, (A)  $\bar{\Phi}$  in Figure 2 and (B)  $\Phi_{SI}$  based on Queyrannes's submodular optimization algorithm [48, 50]. For  $\Phi_{SI}$ , we iterated the simulation 10 times. The error bar indicates the standard deviation at each coupling strength. Both the integrated information measures based on different algorithms demonstrate the maximal  $\Phi$  values near the critical state. Notably, we did not remove trivial partitions (e.g., partitioning the 78 nodes into 1 node and 77 nodes) in the calculation of  $\Phi_{SI}$ , which frequently observed with the model data. However, for the precise calculation of  $\Phi_{SI}$ , it should be handled carefully in the future application.
